# Supplementary material
Source: Springer Nature journal article supplement (https://www.springermedizin.de/resource/supplementary/12936_2012_2461_MOESM5_ESM.pdf/9542910)
Supplement: MOESM5 [file 9542910]

Additional File 4: Recurrence Rates

| First Author                                                                    | Year of Publication | Country               | Partner drug       | Duration of Treatment (days) | Total primaquine dose (mg/kg) | Primaquine Supervision | Duration of Follow Up (days) | Sample Size | Recurrence Rate (%) of <i>P. vivax</i> at end of study |
|---------------------------------------------------------------------------------|---------------------|-----------------------|--------------------|------------------------------|-------------------------------|------------------------|------------------------------|-------------|--------------------------------------------------------|
| <b><u>Very Low Dose Primaquine (<math>\leq 2.5</math> mg/kg Total Dose)</u></b> |                     |                       |                    |                              |                               |                        |                              |             |                                                        |
| Baird                                                                           | 1995                | Indonesia             | Chloroquine        | 3                            | 2.50                          | Not stated             | 28                           | 19          | 15.8                                                   |
| Dixon                                                                           | 1985                | Thailand              | Chloroquine        | 5                            | 1.25                          | Not stated             | 28                           | 40          | 0.0                                                    |
| Krudsood                                                                        | 2008                | Thailand              | Artesunate         | 5                            | 2.50                          | Not stated             | 28                           | 60          | 15.0                                                   |
| Di Lorenzo                                                                      | 1953                | USA (Korea)           | Chloroquine        | 7                            | 1.75                          | Not stated             | 90                           | 31          | 3.0                                                    |
| Villalobos-Salcedo                                                              | 2000                | Brazil                | Chloroquine        | 5                            | 2.50                          | All doses              | 90                           | 30          | 20.0                                                   |
| Alving                                                                          | 1960                | USA (Chesson)         | Chloroquine        | 28                           | 2.00                          | Not stated             | 120                          | 41          | 90.0                                                   |
| Carmona-Fonseca                                                                 | 2009                | Columbia              | Chloroquine        | 3                            | 1.75                          | All doses              | 120                          | 26          | 50.0                                                   |
| Carmona-Fonseca                                                                 | 2009                | Columbia              | Chloroquine        | 3                            | 2.50                          | All doses              | 120                          | 26          | 57.7                                                   |
| Abdon                                                                           | 2001                | Brazil                | Chloroquine        | 5                            | 2.50                          | All doses              | 180                          | 40          | 20.0                                                   |
| Alvarez                                                                         | 2006                | Columbia              | Chloroquine        | 7                            | 1.75                          | All doses              | 180                          | 62          | 41.9                                                   |
| Alvarez                                                                         | 2006                | Columbia              | Chloroquine        | 3                            | 0.75                          | All doses              | 180                          | 65          | 49.2                                                   |
| Bergonzoli                                                                      | 2000                | Nicaragua, Costa Rica | Chloroquine        | 5                            | 2.00                          | All doses              | 180                          | 30          | 0.0                                                    |
| Bergonzoli                                                                      | 2000                | Nicaragua, Costa Rica | Chloroquine        | 1                            | 0.75                          | All doses              | 180                          | 25          | 4.0                                                    |
| Da Silva                                                                        | 2003                | Brazil                | Chloroquine        | 5                            | 2.50                          | Not stated             | 180                          | 26          | 15.4                                                   |
| Da Silva                                                                        | 2003                | Brazil                | Artesunate (100mg) | 5                            | 2.50                          | Not stated             | 180                          | 25          | 16.0                                                   |
| Da Silva                                                                        | 2003                | Brazil                | Artesunate (200mg) | 5                            | 2.50                          | Not stated             | 180                          | 20          | 25.0                                                   |
| Da Silva                                                                        | 2003                | Brazil                | Artesunate (150mg) | 5                            | 2.50                          | Not stated             | 180                          | 20          | 25.0                                                   |
| Fernandopulle                                                                   | 2003                | Sri Lanka             | Not stated         | 5                            | 1.25                          | All doses              | 180                          | 6           | 83.3                                                   |
| Gogtay                                                                          | 1998                | India                 | Chloroquine        | 5                            | 1.25                          | All doses              | 180                          | 100         | 15.0                                                   |
| Gogtay                                                                          | 1999                | India                 | Chloroquine        | 5                            | 1.25                          | All doses              | 180                          | 62          | 25.8                                                   |
| Saint-Yves                                                                      | 1977                | PNG                   | Chloroquine        | 1                            | 0.75                          | All doses              | 180                          | 9           | 67.0                                                   |
| Contacos                                                                        | 1973                | USA (W Pakistan)      | Chloroquine        | 5                            | 1.25                          | Not stated             | 200                          | 5           | 100.0                                                  |
| Singh                                                                           | 1990                | India                 | Chloroquine        | 5                            | 1.25                          | Not stated             | 240                          | 995         | 13.2                                                   |
| Cedillos                                                                        | 1978                | El Salvador           | Amodiaquine        | 5                            | 1.25                          | Part supervised        | 270                          | 90          | 21.1                                                   |
| Cedillos                                                                        | 1978                | El Salvador           | Amodiaquine        | 1                            | 0.75                          | Part supervised        | 270                          | 67          | 23.9                                                   |
| Mendoza                                                                         | 1963                | Mexico                | Chloroquine        | 5                            | 1.25                          | All doses              | 270                          | 389         | 20.6                                                   |
| Rowland                                                                         | 1999                | Pakistan              | Chloroquine        | 5                            | 1.25                          | All doses              | 300                          | 250         | 51.2                                                   |
| Cooper                                                                          | 1953                | USA (Chesson)         | Quinine            | 14                           | 2.33                          | Not stated             | 350                          | 34          | 65.0                                                   |
| Cooper                                                                          | 1953                | USA (Chesson)         | Chloroquine        | 7                            | 2.33                          | Not stated             | 350                          | 10          | 80.0                                                   |
| Thaeler                                                                         | 1953                | Nicaragua             | Chloroquine        | 14                           | 2.33                          | Not stated             | 360                          | 121         | 0.0                                                    |

Additional File 4: Recurrence Rates

| First Author | Year of Publication | Country | Partner drug | Duration of Treatment (days) | Total primaquine dose (mg/kg) | Primaquine Supervision | Duration of Follow Up (days) | Sample Size | Recurrence Rate (%) of P. vivax at end of study |
|--------------|---------------------|---------|--------------|------------------------------|-------------------------------|------------------------|------------------------------|-------------|-------------------------------------------------|
| Adak         | 2001                | India   | Chloroquine  | 5                            | 1.25                          | All doses              | 365                          | 220         | 26.8                                            |
| Appavoo      | 1984                | India   | Chloroquine  | 3                            | 1.25                          | Not stated             | 365                          | 425         | 3.8                                             |
| Prasad       | 1991                | India   | Chloroquine  | 5                            | 1.25                          | All doses              | 365                          | 883         | 2.0                                             |
| Roy          | 1977                | India   | Chloroquine  | 5                            | 1.25                          | Not stated             | 365                          | 6393        | 1.3                                             |
| Roy          | 1979                | India   | Chloroquine  | 5                            | 1.25                          | All doses              | 365                          | 1389        | 0.7                                             |
| Sharma       | 1973                | India   | Chloroquine  | 5                            | 1.25                          | All doses              | 365                          | 140         | 9.3                                             |
| Yadav        | 2002                | India   | Chloroquine  | 5                            | 1.25                          | Not stated             | 365                          | 759         | 6.5                                             |
| Sinha        | 1989                | India   | Chloroquine  | 5                            | 1.25                          | All doses              | 395                          | 725         | 6.9                                             |
| Basavaraj    | 1960                | India   | Chloroquine  | 5                            | 1.25                          | Not stated             | 480                          | 563         | 6.0                                             |
| Dua          | 2001                | India   | Chloroquine  | 5                            | 1.25                          | Not stated             | 540                          | 5541        | 9.2                                             |
| Srivastava   | 1996                | India   | Chloroquine  | 5                            | 1.25                          | Not stated             | 540                          | 173         | 5.8                                             |
| Prasad       | 1991                | India   | Chloroquine  | 5                            | 1.25                          | All doses              | 720                          | 1439        | 4.0                                             |
| Prasad       | 1991                | India   | Chloroquine  | 5                            | 1.25                          | All doses              | 1080                         | 2484        | 5.7                                             |
| Prasad       | 1991                | India   | Chloroquine  | 5                            | 1.25                          | All doses              | 1440                         | 8914        | 23.2                                            |

**Low Dose Primaquine (>2.5 to <5.0 mg/kg Total Dose)**

|              |       |            |                       |    |     |                 |    |     |      |
|--------------|-------|------------|-----------------------|----|-----|-----------------|----|-----|------|
| Looareesuwan | 1999a | Thailand   | Chloroquine           | 14 | 3.5 | All doses       | 28 | 441 | 0.5  |
| Singh        | 2000  | India      | Chloroquine           | 14 | 3.5 | Part supervised | 28 | 75  | 16.0 |
| Buchachart   | 2001  | Thailand   | Chloroquine           | 14 | 3.5 | Not stated      | 28 | 364 | 0.0  |
| Congpuong    | 2002  | Thailand   | Chloroquine           | 14 | 3.5 | Not stated      | 28 | 26  | 0.0  |
| Hamedi       | 2002  | Iran       | Chloroquine           | 14 | 3.5 | All doses       | 28 | 39  | 0.0  |
| Valibayov    | 2003  | Azerbaijan | Chloroquine           | 14 | 3.5 | Not stated      | 28 | 143 | 0.0  |
| Hamedi       | 2004  | Thailand   | Artesunate            | 14 | 3.5 | All doses       | 28 | 42  | 4.8  |
| Yeramian     | 2005  | Thailand   | DB289                 | 14 | 3.5 | Not stated      | 28 | 9   | 11.1 |
| Krudsood     | 2006  | Thailand   | Chloroquine           | 7  | 3.5 | All doses       | 28 | 68  | 1.5  |
| Maguire      | 2006  | Indonesia  | Mefloquine            | 14 | 3.5 | All doses       | 28 | 310 | 1.3  |
| Maguire      | 2006  | Indonesia  | Chloroquine           | 14 | 3.5 | All doses       | 28 | 249 | 21.2 |
| Tasanor      | 2006  | Thailand   | Chloroquine           | 14 | 3.5 | All doses       | 28 | 24  | 0.0  |
| Tasanor      | 2006  | Thailand   | Quinine               | 14 | 3.5 | All doses       | 28 | 23  | 0.0  |
| Krudsood     | 2007  | Thailand   | Chloroquine           | 14 | 3.5 | Not stated      | 28 | 42  | 0.0  |
| Krudsood     | 2007  | Thailand   | Artemether-Lumefantri | 14 | 3.5 | Not stated      | 28 | 38  | 2.6  |

Additional File 4: Recurrence Rates

| First Author       | Year of Publication | Country           | Partner drug | Duration of Treatment (days) | Total primaquine dose (mg/kg) | Primaquine Supervision | Duration of Follow Up (days) | Sample Size | Recurrence Rate (%) of <i>P. vivax</i> at end of study |
|--------------------|---------------------|-------------------|--------------|------------------------------|-------------------------------|------------------------|------------------------------|-------------|--------------------------------------------------------|
| Krudsood           | 2008                | Thailand          | Artesunate   | 9                            | 4.5                           | Not stated             | 28                           | 56          | 4.0                                                    |
| Krudsood           | 2008                | Thailand          | Artesunate   | 7                            | 3.5                           | Not stated             | 28                           | 57          | 11.0                                                   |
| Lee                | 2009                | Republic of Korea | Chloroquine  | 14                           | 3.5                           | Part supervised        | 28                           | 108         | 0.0                                                    |
| Pukrittayakamee    | 2010                | Thailand          | None         | 7                            | 3.5                           | Not stated             | 28                           | 31          | 30.0                                                   |
| Pukrittayakamee    | 1994b               | Thailand          | Chloroquine  | 14                           | 3.5                           | Not stated             | 28                           | 25          | 0.0                                                    |
| Pukrittayakamee    | 1994b               | Thailand          | None         | 14                           | 3.5                           | Not stated             | 28                           | 30          | 10.0                                                   |
| Pukrittayakamee    | 2000                | Thailand          | Chloroquine  | 14                           | 3.5                           | Not stated             | 28                           | 22          | 0.0                                                    |
| Pukrittayakamee    | 2000                | Thailand          | None         | 14                           | 3.5                           | Not stated             | 28                           | 26          | 11.5                                                   |
| Pukrittayakamee    | 1994a               | Thailand          | Chloroquine  | 14                           | 3.5                           | Not stated             | 30                           | 20          | 0.0                                                    |
| Pukrittayakamee    | 1994a               | Thailand          | Rifampicin   | 14                           | 3.5                           | Not stated             | 30                           | 20          | 5.0                                                    |
| Machado            | 2003                | Brazil            | Chloroquine  | 14                           | 3.5                           | Not stated             | 30                           | 30          | 0.0                                                    |
| Muhamed            | 2011                | Thailand          | Chloroquine  | 14                           | 3.5                           | Part supervised        | 42                           | 130         | 0.0                                                    |
| Luxemburger        | 1999                | Thailand          | Chloroquine  | 14                           | 3.5                           | All doses              | 63                           | 43          | 7.0                                                    |
| Villalobos-Salcedo | 2000                | Brazil            | Chloroquine  | 14                           | 3.5                           | All doses              | 90                           | 31          | 6.5                                                    |
| Takeuchi           | 2010                | Thailand          | Chloroquine  | 14                           | 3.5                           | All doses              | 90                           | 90          | 3.3                                                    |
| Takeuchi           | 2010                | Thailand          | Chloroquine  | 14                           | 3.5                           | Unsupervised           | 90                           | 97          | 12.4                                                   |
| Maneeboonyang      | 2011                | Thailand          | Chloroquine  | 14                           | 3.5                           | All doses              | 90                           | 43          | 0.0                                                    |
| Maneeboonyang      | 2011                | Thailand          | Chloroquine  | 14                           | 3.5                           | Unsupervised           | 90                           | 33          | 15.1                                                   |
| Tan-ariya          | 1995                | Thailand          | Chloroquine  | 14                           | 3.5                           | Part supervised        | 100                          | 50          | 12.0                                                   |
| Alving             | 1953                | USA (Korea)       | Chloroquine  | 14                           | 3.5                           | Not stated             | 120                          | 348         | 0.0                                                    |
| Alving             | 1960                | USA (Chesson)     | Chloroquine  | 14                           | 3.5                           | Not stated             | 120                          | 60          | 27.0                                                   |
| Alving             | 1960                | USA (Chesson)     | Chloroquine  | 28                           | 4.0                           | Not stated             | 120                          | 20          | 30.0                                                   |
| Alving             | 1960                | USA (Chesson)     | Chloroquine  | 28                           | 3.0                           | Not stated             | 120                          | 15          | 40.0                                                   |
| Alving             | 1960                | USA (Chesson)     | Chloroquine  | 56                           | 4.0                           | Not stated             | 120                          | 61          | 55.7                                                   |
| Carmona-Fonseca    | 2009                | Columbia          | Chloroquine  | 14                           | 3.5                           | All doses              | 120                          | 66          | 15.2                                                   |
| Carmona-Fonseca    | 2009                | Columbia          | Chloroquine  | 3                            | 3.5                           | All doses              | 120                          | 63          | 58.7                                                   |
| Yeshiwondim        | 2010                | Ethiopia          | Chloroquine  | 14                           | 3.5                           | All doses              | 157                          | 132         | 3.0                                                    |
| Walsh              | 2004                | Thailand          | Chloroquine  | 14                           | 3.5                           | All doses              | 168                          | 12          | 25.0                                                   |
| Coatney            | 1953                | USA (Korea)       | None         | 14                           | 3.5                           | Not stated             | 180                          | 294         | 0.0                                                    |
| Martelo            | 1969                | USA (Vietnam)     | Chloroquine  | 14                           | 3.5                           | Not stated             | 180                          | 21          | 14.3                                                   |
| Fisher             | 1970                | USA (Vietnam)     | Chloroquine  | 14                           | 3.5                           | All doses              | 180                          | 133         | 7.5                                                    |

Additional File 4: Recurrence Rates

| First Author    | Year of Publication | Country               | Partner drug          | Duration of Treatment (days) | Total primaquine dose (mg/kg) | Primaquine Supervision | Duration of Follow Up (days) | Sample Size | Recurrence Rate (%) of P. vivax at end of study |
|-----------------|---------------------|-----------------------|-----------------------|------------------------------|-------------------------------|------------------------|------------------------------|-------------|-------------------------------------------------|
| Gogtay          | 1999                | India                 | Chloroquine           | 14                           | 3.5                           | All doses              | 180                          | 63          | 0.0                                             |
| Bergonzoli      | 2000                | Nicaragua, Costa Rica | Chloroquine           | 14                           | 3.5                           | All doses              | 180                          | 26          | 0.0                                             |
| Bergonzoli      | 2000                | Nicaragua, Costa Rica | Chloroquine           | 9                            | 2.8                           | All doses              | 180                          | 28          | 3.6                                             |
| Abdon           | 2001                | Brazil                | Chloroquine           | 7                            | 3.5                           | All doses              | 180                          | 39          | 0.0                                             |
| Abdon           | 2001                | Brazil                | Chloroquine           | 14                           | 3.5                           | All doses              | 180                          | 40          | 5.0                                             |
| Duarte          | 2001                | Brazil                | Chloroquine           | 14                           | 3.5                           | Part supervised        | 180                          | 50          | 14.0                                            |
| Da Silva        | 2003                | Brazil                | Artesunate (100mg)    | 7                            | 3.5                           | Not stated             | 180                          | 22          | 0.0                                             |
| Da Silva        | 2003                | Brazil                | Chloroquine           | 7                            | 3.5                           | Not stated             | 180                          | 25          | 4.0                                             |
| Da Silva        | 2003                | Brazil                | Artesunate (200mg)    | 7                            | 3.5                           | Not stated             | 180                          | 20          | 5.0                                             |
| Da Silva        | 2003                | Brazil                | Artesunate (150mg)    | 7                            | 3.5                           | Not stated             | 180                          | 24          | 20.8                                            |
| Rajgor          | 2003                | India                 | Chloroquine           | 14                           | 3.5                           | All doses              | 180                          | 103         | 5.8                                             |
| Alvarez         | 2006                | Columbia              | Chloroquine           | 15                           | 3.5                           | All doses              | 180                          | 64          | 18.8                                            |
| Mendoza         | 1963                | Mexico                | Chloroquine           | 14                           | 3.5                           | All doses              | 270                          | 363         | 10.2                                            |
| Miller          | 1974                | USA (Chesson)         | Chloroquine           | 14                           | 3.5                           | Not stated             | 270                          | 57          | 3.5                                             |
| Li              | 1999                | China                 | Chloroquine           | 8                            | 3.0                           | All doses              | 270                          | 35          | 22.9                                            |
| Leslie          | 2004                | Pakistan              | Chloroquine           | 14                           | 3.5                           | All doses              | 270                          | 210         | 19.0                                            |
| Leslie          | 2004                | Pakistan              | Chloroquine           | 14                           | 3.5                           | All doses              | 270                          | 173         | 19.7                                            |
| Smoak           | 1997                | USA (Somalia)         | Chloroquine / Quinine | 14                           | 3.5                           | Part supervised        | 300                          | 32          | 25.0                                            |
| Smoak           | 1997                | USA (Somalia)         | Chloroquine / Quinine | 14                           | 3.5                           | Part supervised        | 300                          | 28          | 64.2                                            |
| Rowland         | 1999                | Pakistan              | Chloroquine           | 14                           | 3.5                           | All doses              | 300                          | 100         | 32.0                                            |
| Orjuela-Sanchez | 2009                | Brazil                | Chloroquine           | 7                            | 3.5                           | Part supervised        | 336                          | 87          | 71.5                                            |
| Cooper          | 1953                | USA (Chesson)         | Quinine               | 14                           | 4.7                           | Not stated             | 350                          | 34          | 15.0                                            |
| Cooper          | 1953                | USA (Chesson)         | Chloroquine           | 7                            | 3.5                           | Not stated             | 350                          | 10          | 90.0                                            |
| Orjuela-Sanchez | 2009                | Brazil                | Chloroquine           | 7                            | 3.5                           | Part supervised        | 355                          | 77          | 36.6                                            |
| Thaeler         | 1953                | Nicaragua             | Chloroquine           | 14                           | 3.5                           | Not stated             | 360                          | 151         | 0.0                                             |
| Thaeler         | 1953                | Nicaragua             | Chloroquine           | 14                           | 4.7                           | Not stated             | 360                          | 49          | 0.0                                             |
| Alving          | 1955                | USA (Chesson)         | Quinine               | 14                           | 3.5                           | Not stated             | 365                          | 19          | 5.3                                             |
| Alving          | 1955                | USA (Chesson)         | Chloroquine           | 14                           | 3.5                           | Not stated             | 365                          | 19          | 26.3                                            |
| Alving          | 1955                | USA (Chesson)         | None                  | 14                           | 3.5                           | Not stated             | 365                          | 19          | 78.9                                            |
| Saint-Yves      | 1977                | PNG                   | Chloroquine           | 14                           | 3.50                          | All doses              | 365                          | 10          | 0.0                                             |
| Schwartz        | 2000                | Israel                | Chloroquine           | 14                           | 3.5                           | Not stated             | 365                          | 15          | 33.3                                            |

Additional File 4: Recurrence Rates

| First Author | Year of Publication | Country           | Partner drug | Duration of Treatment (days) | Total primaquine dose (mg/kg) | Primaquine Supervision | Duration of Follow Up (days) | Sample Size | Recurrence Rate (%) of <i>P. vivax</i> at end of study |
|--------------|---------------------|-------------------|--------------|------------------------------|-------------------------------|------------------------|------------------------------|-------------|--------------------------------------------------------|
| Bunnag       | 1994                | Thailand          | Chloroquine  | 14                           | 3.5                           | Not stated             | 540                          | 81          | 8.6                                                    |
| Jelinek      | 1995                | Germany           | Chloroquine  | 14                           | 3.5                           | Not stated             | 540                          | 56          | 12.5                                                   |
| Fang         | 1999                | Taiwan            | Chloroquine  | 14                           | 3.5                           | Not stated             | 540                          | 12          | 8.3                                                    |
| Moon         | 2009                | Republic of Korea | Chloroquine  | 14                           | 3.5                           | Not stated             | 660                          | 3881        | 1.6                                                    |
| Haghdoost    | 2006                | Iran              | Chloroquine  | 14                           | 3.5                           | Not stated             | 2555                         | 12337       | 7.4                                                    |

**High Dose Primaquine ( $\geq 5.0$  mg/kg Total Dose)**

|                 |       |               |                        |    |      |              |     |     |      |
|-----------------|-------|---------------|------------------------|----|------|--------------|-----|-----|------|
| Baird           | 1995  | Indonesia     | Chloroquine            | 27 | 10.0 | Not stated   | 28  | 26  | 15.4 |
| Baird           | 1995  | Indonesia     | Chloroquine (10mg/kg)  | 27 | 10.0 | Not stated   | 28  | 23  | 13.0 |
| Fryauff         | 1997  | Indonesia     | Halofantrine           | 28 | 10.0 | All doses    | 28  | 26  | 0.0  |
| Fryauff         | 1997  | Indonesia     | Chloroquine            | 28 | 10.0 | All doses    | 28  | 27  | 11.1 |
| Wilairatana     | 1999  | Thailand      | Artesunate             | 14 | 7.0  | Not stated   | 28  | 15  | 0.0  |
| Wilairatana     | 1999  | Thailand      | Sulfadoxine-Pyrimethar | 14 | 7.0  | Not stated   | 28  | 19  | 0.0  |
| Wilairatana     | 1999  | Thailand      | None                   | 14 | 7.0  | Not stated   | 28  | 17  | 0.0  |
| Lacy            | 2002  | Indonesia     | Atovaquone/Proguanil   | 14 | 7.0  | Not stated   | 28  | 16  | 0.0  |
| Silachamroon    | 2003  | Thailand      | Artesunate (5d)        | 14 | 7.0  | Not stated   | 28  | 142 | 0.0  |
| Silachamroon    | 2003  | Thailand      | Artesunate (7d)        | 14 | 7.0  | Not stated   | 28  | 157 | 0.0  |
| Dao             | 2007  | Vietnam       | Artesunate             | 7  | 5.3  | All doses    | 28  | 28  | 3.6  |
| Krudsood        | 2008  | Thailand      | Artesunate             | 11 | 5.5  | Not stated   | 28  | 48  | 0.0  |
| Krudsood        | 2008  | Thailand      | Artesunate             | 14 | 7.0  | Not stated   | 28  | 52  | 0.0  |
| Krudsood        | 2008  | Thailand      | Artesunate             | 7  | 7.0  | Not stated   | 28  | 49  | 4.0  |
| Pukrittayakamee | 2010  | Thailand      | None                   | 7  | 7.0  | Not stated   | 28  | 33  | 6.0  |
| Looareesuwan    | 1999b | Thailand      | Atovaquone/Proguanil   | 14 | 7.0  | Not stated   | 84  | 35  | 5.7  |
| Alving          | 1960  | USA (Chesson) | Chloroquine            | 56 | 8.0  | Not stated   | 120 | 51  | 5.9  |
| Alving          | 1960  | USA (Chesson) | Chloroquine            | 56 | 6.0  | Not stated   | 120 | 40  | 10.0 |
| Alving          | 1960  | USA (Chesson) | Chloroquine            | 98 | 7.0  | Not stated   | 120 | 30  | 20.0 |
| Contacos        | 1974  | USA (Chesson) | Chloroquine            | 56 | 6.0  | Not stated   | 133 | 10  | 0.0  |
| Martelo         | 1969  | USA (Vietnam) | Chloroquine            | 56 | 6.0  | Not stated   | 180 | 21  | 28.6 |
| Fisher          | 1970  | USA (Vietnam) | Chloroquine            | 56 | 6.0  | Unsupervised | 180 | 94  | 22.3 |
| Clyde           | 1977  | USA (Chesson) | Chloroquine            | 7  | 7.0  | All doses    | 293 | 11  | 0.0  |
| Leslie          | 2008  | Pakistan      | Chloroquine            | 14 | 7.0  | All doses    | 330 | 54  | 1.9  |

#### Additional File 4: Recurrence Rates

| First Author | Year of Publication | Country       | Partner drug | Duration of Treatment (days) | Total primaquine dose (mg/kg) | Primaquine Supervision | Duration of Follow Up (days) | Sample Size | Recurrence Rate (%) of <i>P. vivax</i> at end of study |
|--------------|---------------------|---------------|--------------|------------------------------|-------------------------------|------------------------|------------------------------|-------------|--------------------------------------------------------|
| Leslie       | 2008                | Pakistan      | Chloroquine  | 56                           | 6.0                           | All doses              | 330                          | 68          | 5.9                                                    |
| Saint-Yves   | 1977                | PNG           | Chloroquine  | 14                           | 5.3                           | All doses              | 365                          | 10          | 0.0                                                    |
| Bunnag       | 1994                | Thailand      | Chloroquine  | 14                           | 5.3                           | Not stated             | 540                          | 86          | 1.2                                                    |
| Kaplan       | 1974                | USA (Somalia) | Chloroquine  | 21                           | 5.3                           | All doses              | 895                          | 207         | 4.3                                                    |

#### **Primaquine Dose Not Stated**

|       |      |       |              |    |            |            |    |     |     |
|-------|------|-------|--------------|----|------------|------------|----|-----|-----|
| Dunne | 2005 | India | Azithromycin | 14 | Not Stated | Not stated | 28 | 100 | 0.0 |
| Dunne | 2005 | India | Chloroquine  | 14 | Not Stated | Not stated | 28 | 97  | 0.9 |

#### **Control Arms (No Primaquine)**

|                 |       |               |             |  |               |  |     |     |      |
|-----------------|-------|---------------|-------------|--|---------------|--|-----|-----|------|
| Dixon           | 1985  | Thailand      | Chloroquine |  | No Primaquine |  | 28  | 11  | 0.0  |
| Pukrittayakamee | 1994b | Thailand      | Chloroquine |  | No Primaquine |  | 28  | 30  | 0.0  |
| Baird           | 1995  | Indonesia     | Chloroquine |  | No Primaquine |  | 28  | 23  | 87.0 |
| Baird           | 1995  | Indonesia     | Chloroquine |  | No Primaquine |  | 28  | 22  | 68.2 |
| Looareesuwan    | 1999a | Thailand      | Chloroquine |  | No Primaquine |  | 28  | 445 | 0.5  |
| Pukrittayakamee | 2000  | Thailand      | Chloroquine |  | No Primaquine |  | 28  | 21  | 0.0  |
| Walsh           | 2004  | Thailand      | Chloroquine |  | No Primaquine |  | 56  | 10  | 80.0 |
| Luxemburger     | 1999  | Thailand      | Chloroquine |  | No Primaquine |  | 63  | 69  | 55.1 |
| Di Lorenzo      | 1953  | USA (Korea)   | Chloroquine |  | No Primaquine |  | 90  | 46  | 50.0 |
| Alving          | 1953  | USA (Korea)   | Chloroquine |  | No Primaquine |  | 120 | 355 | 38.6 |
| Alving          | 1960  | USA (Chesson) | Chloroquine |  | No Primaquine |  | 120 | 74  | 95.9 |
| Yeshiwondim     | 2010  | Ethiopia      | Chloroquine |  | No Primaquine |  | 157 | 108 | 8.3  |
| Gogtay          | 1999  | India         | Chloroquine |  | No Primaquine |  | 180 | 60  | 11.7 |
| Rajgor          | 2003  | India         | Chloroquine |  | No Primaquine |  | 180 | 101 | 12.9 |
| Leslie          | 2004  | Pakistan      | Chloroquine |  | No Primaquine |  | 270 | 212 | 40.6 |
| Rowland         | 1999  | Pakistan      | Chloroquine |  | No Primaquine |  | 300 | 250 | 51.6 |
| Rowland         | 1999  | Pakistan      | Chloroquine |  | No Primaquine |  | 300 | 100 | 49.0 |
| Leslie          | 2008  | Pakistan      | Chloroquine |  | No Primaquine |  | 330 | 68  | 32.4 |
| Adak            | 2001  | India         | Chloroquine |  | No Primaquine |  | 365 | 224 | 40.2 |
| Yadav           | 2002  | India         | Chloroquine |  | No Primaquine |  | 365 | 723 | 8.6  |
